# Supplementary material for: Metabolic Evaluation of Urine from Patients Diagnosed with High Grade (HG) Bladder Cancer by SPME-LC-MS Method
Source: PubMed Central journal article supplement (PMC8068997; doi:10.3390/molecules26082194), 2021-04-11
Supplement: molecules-26-02194-s001.pdf [file molecules-26-02194-s001.pdf]

## Supplementary information

Tab. S1. Differential metabolites in positive and negative ionization mode with information on the annotation in the ChemSpider database (Sfit – Spectral similarity score between theoretical and measured isotope pattern in %)

| Metabolites                                  | # ChemSpider results | Full match  | $\Delta$ mass [ppm] | # matched /missed isotopes | Sfit [%] |
|----------------------------------------------|----------------------|-------------|---------------------|----------------------------|----------|
| <b>Positive ionization mode</b>              |                      |             |                     |                            |          |
| Benzoic acid                                 | 33                   | 1           | 1.27                | 2/0                        | 91       |
| Hippuric acid                                | 345                  | 1           | 0.30                | 1/0                        | 100      |
| 4-Hydroxycinnamic acid                       | 195                  | 1           | 0.61                | 2/0                        | 93       |
| N-Acetyl-phenylalanine                       | 940                  | 1           | 0.57                | 2/0                        | 91       |
| Histidine                                    | 174                  | 1           | 0.32                | 5/0                        | 77       |
| Carnosine                                    | 106                  | 1           | 0.67                | 2/0                        | 74       |
| Theophylline                                 | 93                   | 1           | 0.08                | 2/0                        | 83       |
| 3-Methylxanthine                             | 71                   | 1           | 0.10                | 3/0                        | 85       |
| LysoPE(18:1)                                 | 37                   | 1           | 0.48                | 3/0                        | 80       |
| Retinol                                      | 224                  | 9 (isomers) | 0.66                | 3/0                        | 71       |
| 2-Acetyl-1-alkyl-sn-glycero-3-phosphocholine | 23                   | 3           | 0.05                | 3/0                        | 81       |
| Isoniazid                                    | 82                   | 1           | 0.13                | 1/0                        | 100      |
| p-Aminobenzoic acid                          | 130                  | 1           | 0.52                | 2/0                        | 79       |
| 3-Dehydroxycarnitine                         | 295                  | 1           | 0.04                | 4/0                        | 79       |
| Epinephrine                                  | 365                  | 1           | 0.51                | 2/0                        | 86       |
| 5-Hydroxyindoleacetic acid                   | 364                  | 1           | 0.28                | 2/0                        | 76       |
| Adenine                                      | 50                   | 1           | 0.38                | 2/0                        | 92       |
| <b>Negative ionization mode</b>              |                      |             |                     |                            |          |
| 3-(3-sulfooxyphenyl)propanoic acid           | 8                    | 1           | 1.14                | 3/0                        | 92       |
| Hippuric acid                                | 345                  | 1           | 0.46                | 3/0                        | 70       |
| Gluconic acid                                | 22                   | 17          | 2.25                | 3/0                        | 75       |
| Adenosine monophosphate                      | 56                   | 10          | 0.10                | 3/0                        | 73       |
| Indolelactic acid                            | 695                  | 1           | 0.36                | 3/0                        | 79       |

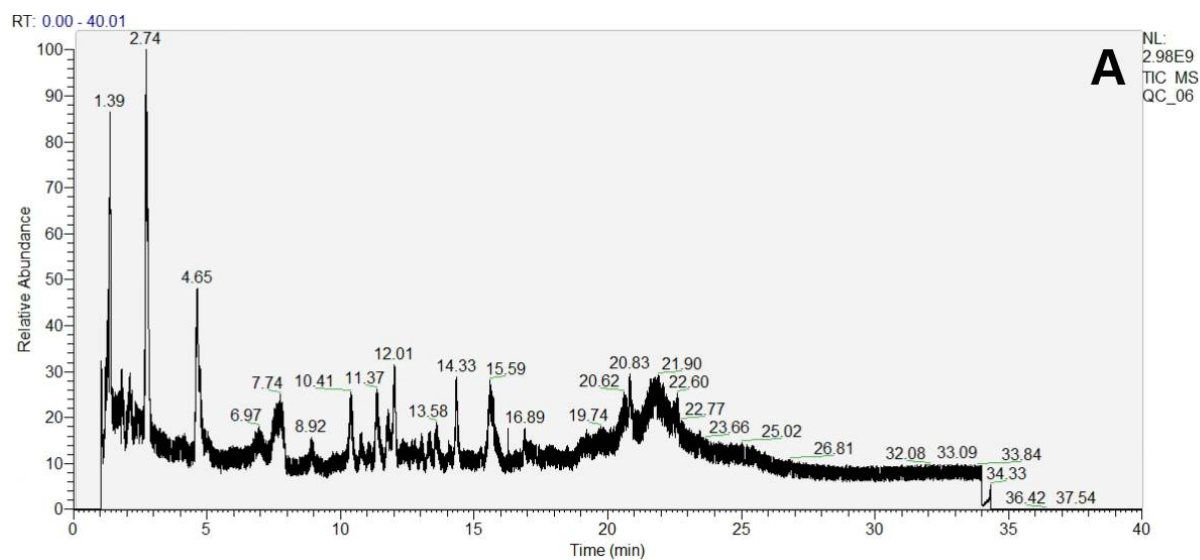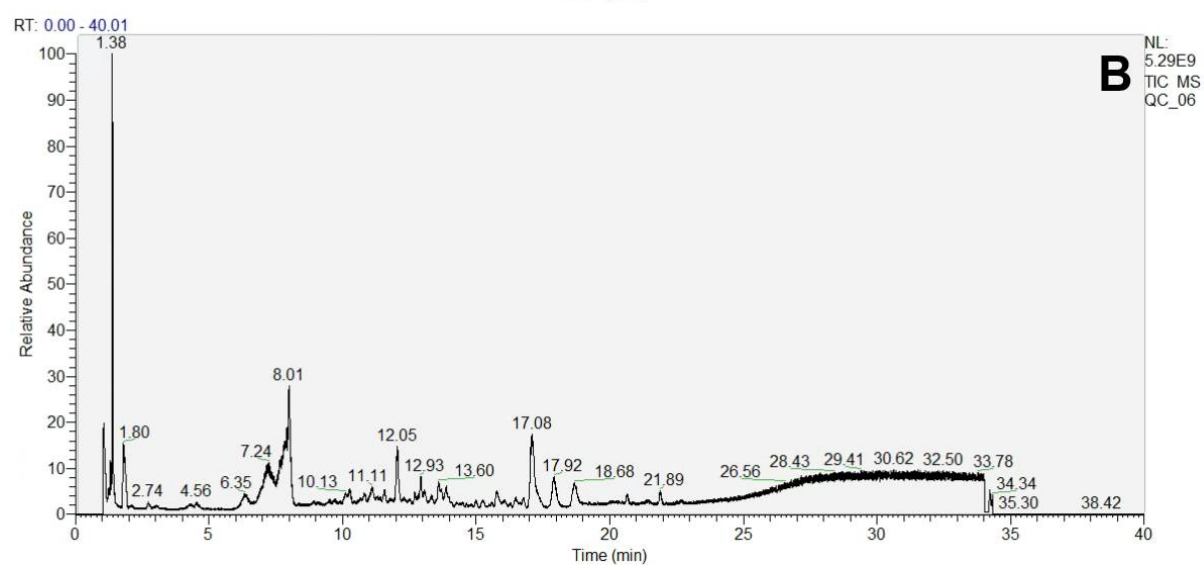

Fig. S1. Total ion chromatogram of QC sample in positive (A) and negative (B) ionization mode.

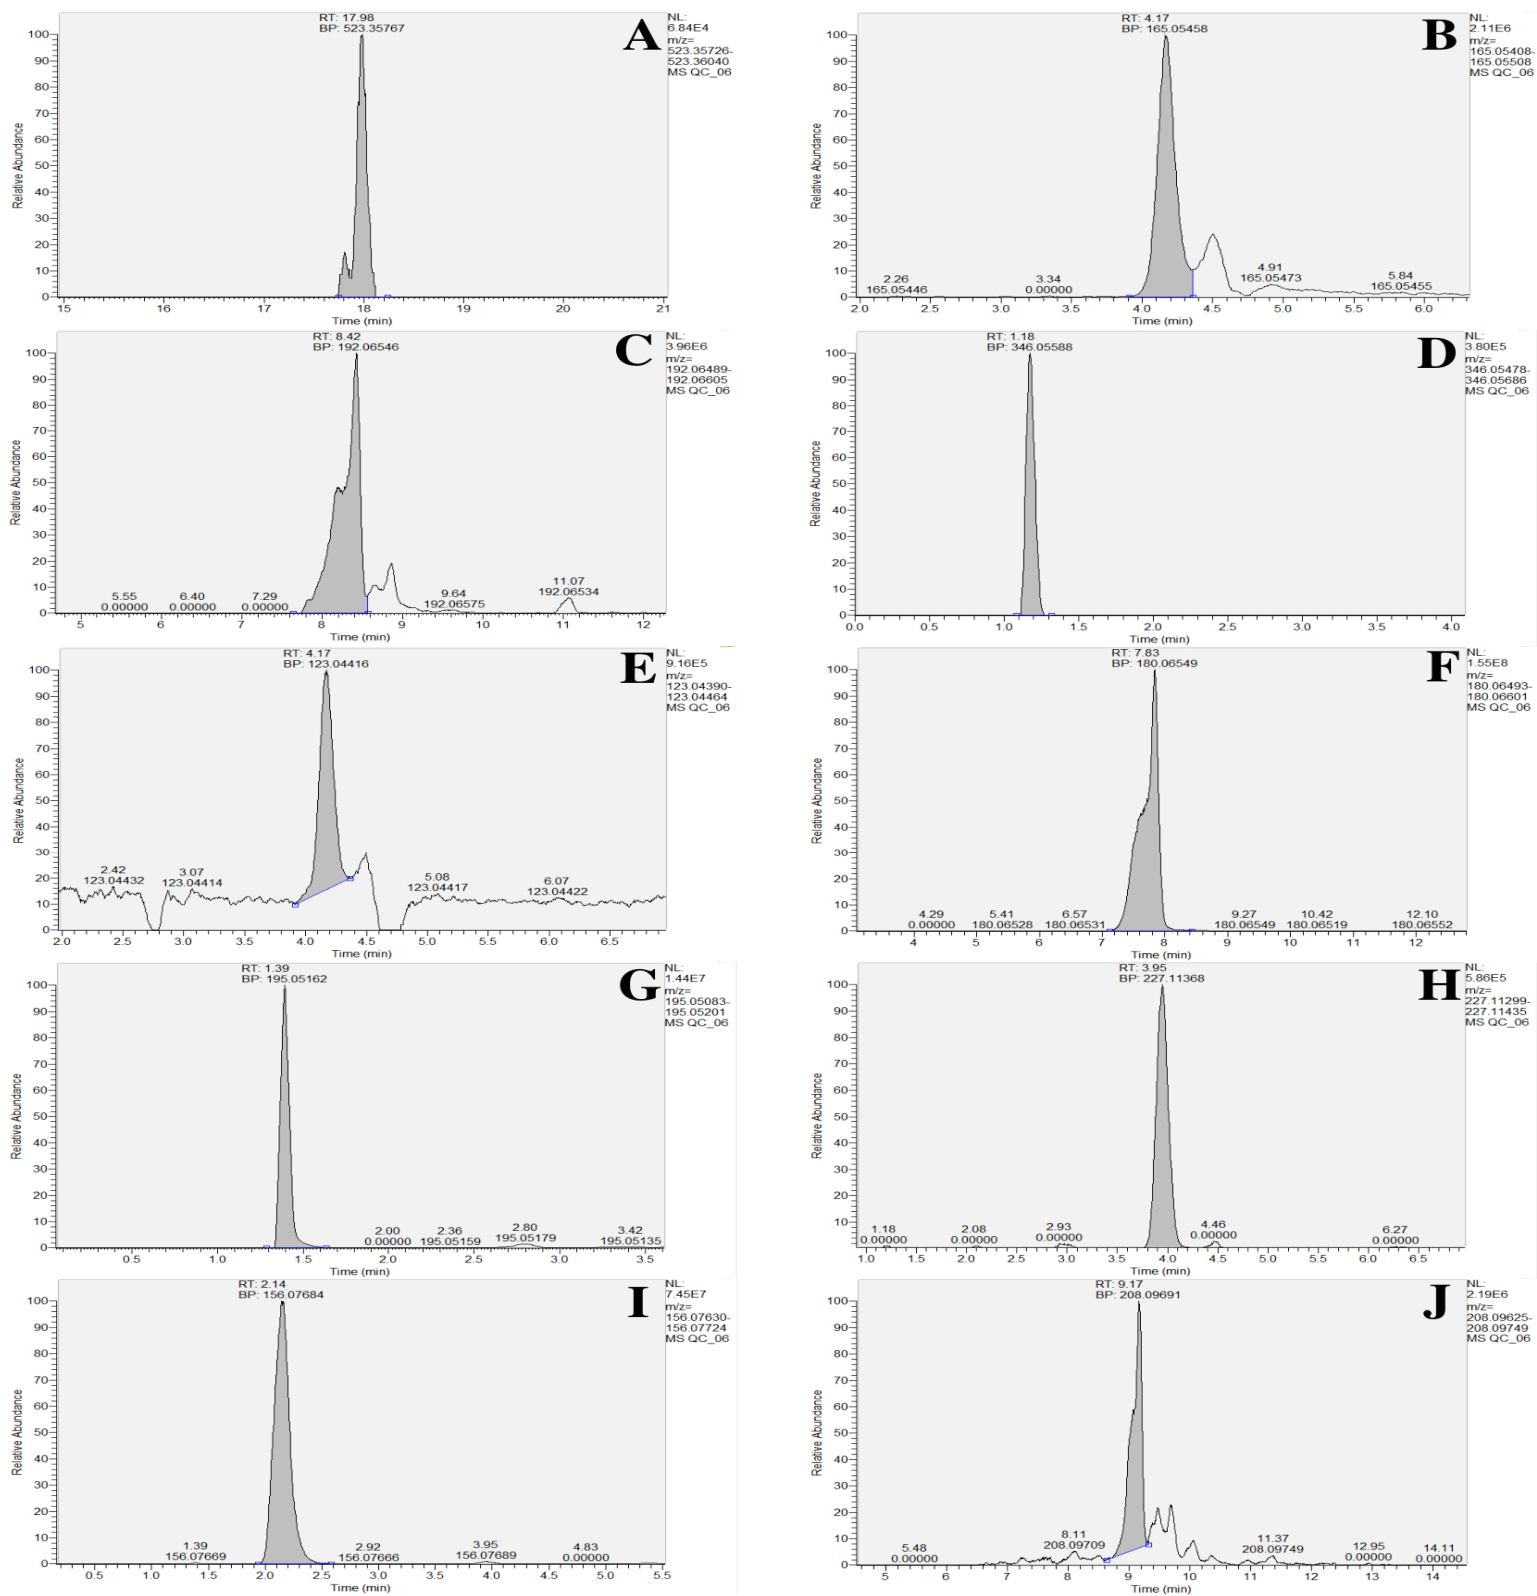

Fig. S2. Chromatograms for selected compounds differentiating the studied groups: 2-Acetyl-1-alkyl-sn-glycero-3-phosphocholine (A), 4-Hydroxycinnamic acid (B), 5-Hydroxyindoleacetic acid (C), Adenosine monophosphate (D), Benzoic acid (E), Hippuric acid (F), Gluconic acid (G), Carnosine (H), Histidine (I), N-Acetyl-phenylalanine (J)
